# Supplementary material for: Genome-wide identification and analysis of ascorbate peroxidase (APX) gene family in hemp (Cannabis sativa L.) under various abiotic stresses
Source: PeerJ. 2024 Apr 26;12:e17249. doi: 10.7717/peerj.17249 (PMC11057428; doi:10.7717/peerj.17249)
Supplement: Data S1 [file peerj-12-17249-s002.xlsx]

## Sheet: Sheet1
Cold
Taxon	0h	0h	0h	3h	3h	3h	6h	6h	6h	12h	12h	12h	24h	24h	24h	48h	48h	48h
APX1	1.03319	0.8106	1.19402	0.993312	0.97296	1.39668	4.17637	4.34748	5.11365	9.61391	8.5007	8.53781	15.1197	14.6458	16.0163	20.5339	20.5497	19.4335
APX2	1.03319	0.8106	1.19402	1.7652	1.81575	1.9889	2.48635	2.11759	1.82585	4.72526	3.82446	4.49219	9.01028	8.64021	8.36622	10.8811	11.7857	10.4218
APX3	1.13319	1.09212	0.808026	2.09025	2.24609	2.12354	4.68465	5.15355	4.92981	10.6494	9.85767	9.18786	4.52421	4.05302	3.91546	1.32971	1.11997	1.69751
APX4	0.997607	1.05266	0.952255	1.36275	1.87365	1.53625	2.25448	1.96577	2.28086	5.33863	4.94649	5.20274	3.47084	3.2077	3.54659	1.97262	2.34008	2.2446
APX5	1.0153	1.08553	0.989628	0.856473	0.766374	0.799843	0.474849	0.399956	0.48795	0.290247	0.246089	0.223538	1.13917	0.966512	1.01807	3.3722	3.25881	3.38821
APX6	0.910218	1.10426	0.912294	1.17637	1.34748	1.11365	1.4652	1.51575	1.7889	4.19338	3.88285	4.02891	5.97063	6.24383	6.17815	2.30738	2.50784	2.80223
APX7	1.13319	1.09212	0.808026	2.44609	2.62354	2.93917	6.37982	5.81282	5.18586	9.64942	10.8577	11.1879	19.4444	20.1075	19.2811	7.99594	8.58802	9.24523
APX8	0.990719	1.12041	1.06114	1.37296	1.43472	1.1499	1.54901	1.7983	1.61052	2.51544	2.67984	2.93926	5.26946	4.94279	4.92582	7.41846	7.45803	7.03555
Drought
Taxon	0h	0h	0h	3h	3h	3h	6h	6h	6h	12h	12h	12h	24h	24h	24h	48h	48h	48h
APX1	1.03319	0.8106	1.19402	1.47163	1.6847	1.29929	1.85552	2.14501	2.16381	4.22653	4.16084	3.80618	7.71751	7.4997	8.24068	9.61653	9.64321	10.2733
APX2	1.03319	0.8106	1.19402	8.71751	8.4997	9.24068	16.6108	16.0473	16.7727	22.0781	23.5708	22.3237	5.80631	6.88617	6.05042	16.2417	15.4999	15.8017
APX3	1.13319	1.09212	0.808026	1.41852	1.78727	2.62042	1.46901	1.63872	1.54493	2.9196	3.48339	3.32908	1.85552	1.84501	2.06381	1.22165	1.33826	1.4271
APX4	0.997607	1.01266	0.982255	0.673648	0.715264	0.700326	0.482456	0.502132	0.472589	1.71655	1.85869	1.76605	1.99579	2.00978	2.04228	1.76619	1.83628	1.70261
APX5	1.0153	1.08553	0.989628	0.665838	0.654456	0.512356	0.272912	0.292912	0.297819	4.02932	3.7831	3.88468	8.12049	7.88116	7.83673	12.1447	12.3614	11.9449
APX6	0.910218	1.00426	0.912294	1.66892	1.7489	1.62159	2.6602	2.51787	2.58743	2.95489	2.99848	3.13263	1.86892	2.0489	1.92159	1.06767	1.15353	1.01383
APX7	1.13319	1.09212	0.808026	4.22653	4.16084	3.80618	6.98878	7.03316	7.85913	4.90754	5.30901	5.11515	2.21852	2.58727	2.52042	1.47163	1.6847	1.29929
APX8	0.990719	1.12041	1.06114	0.74536	0.693131	0.650847	0.445951	0.512082	0.424179	0.802796	0.738844	0.715846	1.17383	1.06489	1.03762	2.95377	3.11018	3.20279
Nacl
Taxon	0h	0h	0h	3h	3h	3h	6h	6h	6h	12h	12h	12h	24h	24h	24h	48h	48h	48h
APX1	0.846229	1.26389	0.934983	0.727961	0.73126	0.681476	0.42909	0.362401	0.389764	0.449104	0.401784	0.522226	0.526193	0.594058	0.63353	1.0252	1.08455	0.984338
APX2	1.03319	0.8106	1.19402	0.485056	0.538242	0.503391	0.296344	0.22228	0.233385	0.91082	0.942018	1.07723	1.80298	2.12211	1.87056	2.53659	2.35075	2.11699
APX3	1.0619	0.941709	1.02386	1.81795	1.77968	1.7126	2.34496	2.2995	1.81894	7.98528	7.73674	8.04568	6.58122	5.95925	6.3267	3.84801	4.33106	4.10687
APX4	0.989359	1.04327	0.997984	0.510964	0.546381	0.527961	0.210964	0.246381	0.227961	0.23126	0.211476	0.204909	0.0235757	0.0224018	0.0259954	0.0258448	0.0205004	0.0217442
APX5	1.04071	0.986536	0.979476	0.238475	0.218476	0.194715	0.0374679	0.0354679	0.0391638	0.0384379	0.0364379	0.0394963	0.0354533	0.0353213	0.0388938	0.151665	0.153665	0.149485
APX6	0.980218	1.00426	0.912294	0.734733	0.693096	0.597752	0.330061	0.410603	0.385056	0.838242	0.793391	0.771332	1.89138	1.8418	2.08976	2.91019	3.05731	3.16739
APX7	1.13319	1.09212	0.908026	2.73659	2.55075	2.41699	4.19014	3.85855	4.26963	7.71521	7.94901	8.04316	4.64745	3.96455	4.38195	2.92652	3.15519	2.81247
APX8	1.13653	1.10979	0.968476	0.656265	0.779833	0.833937	0.428799	0.398799	0.36788	1.31795	1.07968	1.1126	3.56974	3.30986	3.37692	1.79346	1.80174	1.9829
Oxidative
Taxon	0h	0h	0h	3h	3h	3h	6h	6h	6h	12h	12h	12h	24h	24h	24h	48h	48h	48h
APX1	0.886229	1.26389	0.934983	0.493085	0.52384	0.593181	0.215795	0.337131	0.387365	0.677363	0.511247	0.56974	0.0416413	0.0977736	0.191775	0.045956	0.0606982	0.0609524
APX2	1.03319	0.8906	1.19402	0.881908	0.949936	0.0917209	0.65834	0.628039	0.547116	0.446102	0.350306	0.406485	0.250842	0.224944	0.235079	0.135804	0.138829	0.0664519
APX3	1.0619	0.941709	1	0.826213	0.768045	0.838676	0.580962	0.590813	0.692263	0.580962	0.436261	0.493231	0.295775	0.259359	0.253433	0.200193	0.16604	0.182053
APX4	0.999359	1.04327	0.987984	0.812337	0.783615	0.782635	0.519758	0.484096	0.494425	0.338688	0.296547	0.300717	0.13595	0.124387	0.114597	0.124755	0.108691	0.119042
APX5	1.04071	0.986536	0.979476	0.521957	0.491548	0.53422	0.12683	0.162326	0.138927	0.145415	0.15834	0.128039	0.147116	0.124356	0.121197	0.149206	0.163881	0.156089
APX6	0.980218	1.10426	0.962294	1.56308	1.5408	1.4402	2.37047	2.46282	2.32578	1.58096	1.43626	1.56979	1.0244	0.996008	0.914919	2.5155	2.64196	2.50479
APX7	1.13319	1.09212	0.908026	0.996451	1.0947	1.11393	1.09512	0.974543	1.23402	1.10706	1.10929	1.01157	1.6884	1.56573	1.51669	2.28188	1.98702	2.45954
APX8	1.03653	1.10979	0.968476	0.725096	0.806502	0.687018	0.447533	0.499654	0.593085	0.22384	0.293181	0.20977	0.946451	0.994701	1.11393	2.14138	1.96171	2.00836
